# Supplementary material
Source: Copernicus journal article supplement (doi:10.5194/essd-18-4489-2026)
Supplement: Supplementary file 1 [file essd-18-4489-2026-supplement.pdf]

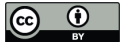

*Supplement of*

**HDM-Plot: a plot dataset of plant communities across three-dimensional zonal vegetation in the Hengduan Mountains and adjacent regions, southwestern China**

**Yili Jin et al.**

*Correspondence to:* Xingxing Mao ([xyz1314@zjnu.edu.cn](mailto:xyz1314@zjnu.edu.cn)) and Jian Ni ([nijian@zjnu.edu.cn](mailto:nijian@zjnu.edu.cn))

The copyright of individual parts of the supplement might differ from the article licence.

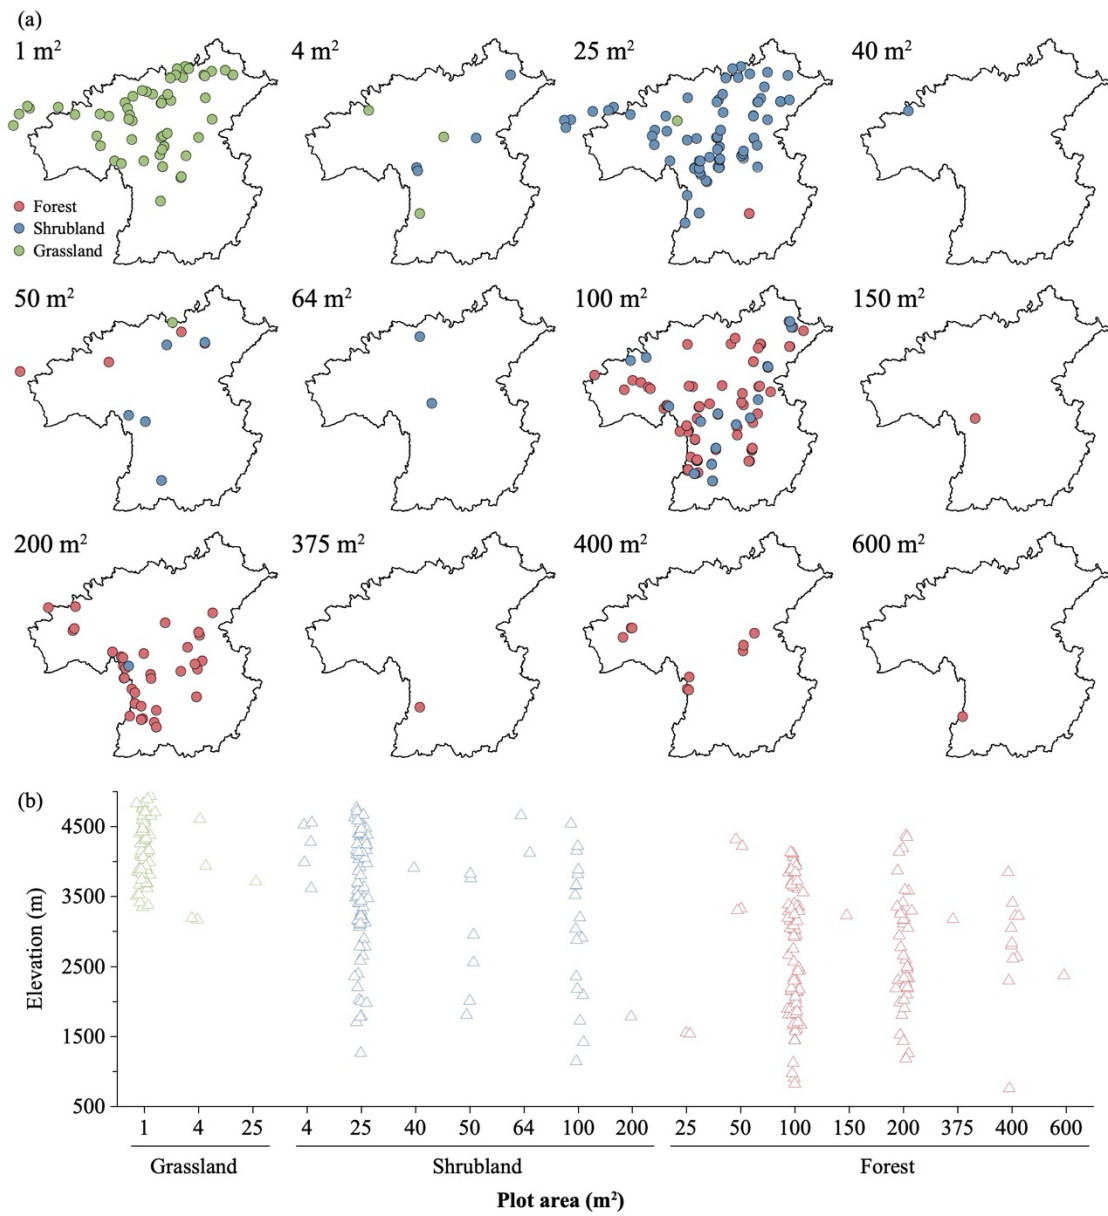

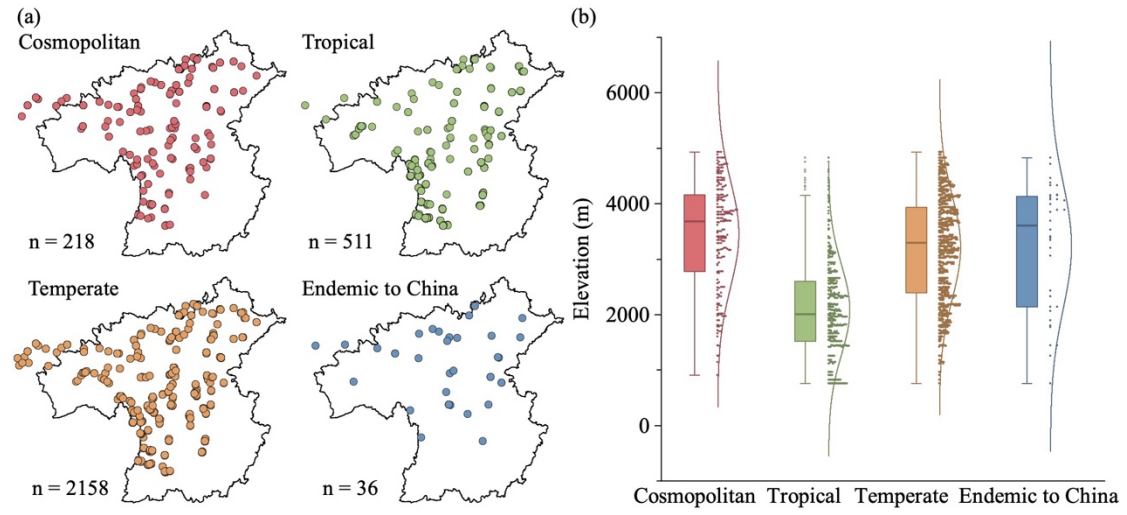

**Figure S2.** Spatial (a) and elevational (b) distributions of genus-level areal-type groups based on plot–genus occurrences. n denotes the total number of plot–genus occurrence.

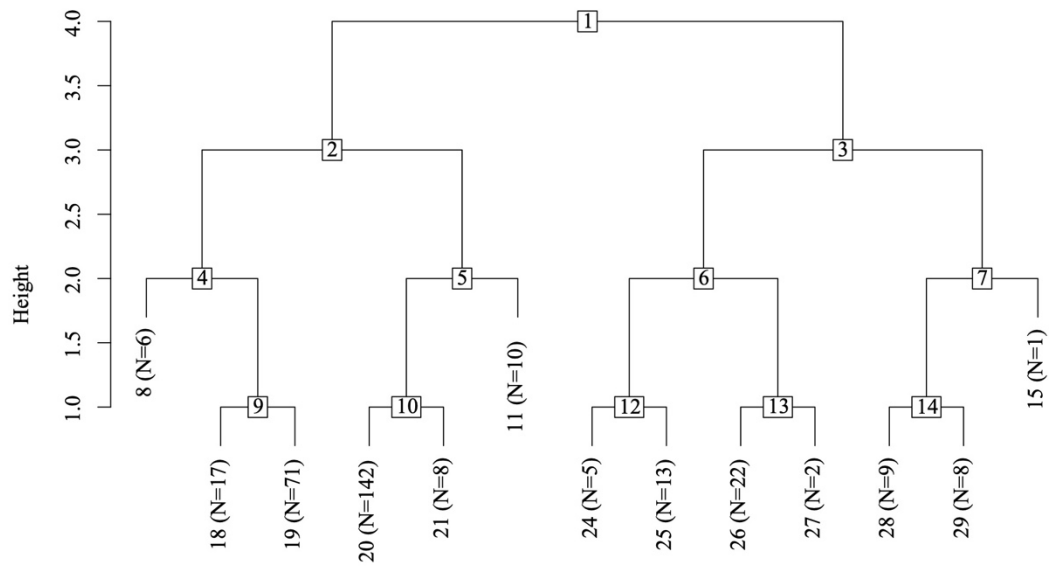

**Figure S3.** Two-way indicator species analysis of vegetation plots in the HDM-Plot dataset.

**Table S1** Relative area of vegetation regionalization units and mapped vegetation types in the HDM-Plot study region

| Vegetation unit                   | Area (km <sup>2</sup> ) | Relative area (%) |
|-----------------------------------|-------------------------|-------------------|
| <b>Vegetation regionalization</b> |                         |                   |
| I                                 | 632,189                 | 86.7              |
| II                                | 62,040                  | 8.5               |
| III                               | 34,248                  | 4.7               |
| <b>Vegetation types</b>           |                         |                   |
| TRF                               | 6,469                   | 0.9               |
| DHVSG                             | 91,381                  | 12.5              |
| SEBF                              | 176,385                 | 24.2              |
| SMNBF                             | 5,173                   | 0.7               |
| TDBFS                             | 10,284                  | 1.4               |
| SANF                              | 116,924                 | 16.0              |
| SAS                               | 169,306                 | 23.2              |
| TM                                | 14,654                  | 2.0               |
| AM                                | 96,771                  | 13.3              |
| AV                                | 41,378                  | 5.7               |



**Table S3** Floristic areal-types at family and genus levels in the HDM-Plot dataset.

| Areal-types      | Family level (percentage, %) |                | Genus level (percentage, %) |                |
|------------------|------------------------------|----------------|-----------------------------|----------------|
|                  | No. of families              | No. of species | No. of genera               | No. of species |
| 1                | 30.8                         | 48.6           | 6.6                         | 8.6            |
| 2                | 24.8                         | 12.1           | 11.6                        | 9.6            |
| 3                | 8.5                          | 4.3            | 2.9                         | 3.1            |
| 4                | 2.6                          | 0.4            | 5.3                         | 2.5            |
| 5                | 1.7                          | 0.3            | 2.9                         | 1.6            |
| 6                | /                            | /              | 2.6                         | 1.2            |
| 7                | 1.7                          | 1.2            | 10.0                        | 5.3            |
| 8                | 18.8                         | 29.4           | 23.2                        | 47.2           |
| 9                | 5.1                          | 2.5            | 7.1                         | 5.1            |
| 10               | 0.9                          | 0.1            | 6.3                         | 3.8            |
| 11               | /                            | /              | 1.8                         | 1.8            |
| 12               | /                            | /              | 0.8                         | 0.4            |
| 13               | /                            | /              | 0.8                         | 0.4            |
| 14               | 5.1                          | 1.2            | 14.0                        | 7.9            |
| 15               | /                            | /              | 4.0                         | 1.3            |
| Cosmopolitan     | 30.8                         | 48.6           | 6.6                         | 8.6            |
| Tropical         | 39.3                         | 18.3           | 35.4                        | <b>23.3</b>    |
| Temperate        | 29.9                         | 33.1           | 54.1                        | <b>66.7</b>    |
| Endemic to China | /                            | /              | 4.0                         | 1.3            |

**Table S4** Vegetation classification of plant communities in the HDM-Plot dataset

| Group  | Formation                  | Alliance group           | No of Plot                  |   |
|--------|----------------------------|--------------------------|-----------------------------|---|
| Forest | DNF                        | <i>Larix</i>             | 4                           |   |
|        | DENF                       | <i>Larix + Abies</i>     | 1                           |   |
|        | ENF                        | <i>Abies</i>             | 12                          |   |
|        |                            | <i>Cunninghamia</i>      | 1                           |   |
|        |                            | <i>Juniperus</i>         | 3                           |   |
|        |                            | <i>Picea</i>             | 8                           |   |
|        |                            | <i>Picea + Juniperus</i> | 1                           |   |
|        |                            | <i>Pinus</i>             | 21                          |   |
|        |                            | <i>Tsuga</i>             | 3                           |   |
|        |                            | <i>Tsuga + Abies</i>     | 1                           |   |
|        |                            | NBF                      | <i>Abies + Quercus</i>      | 3 |
|        |                            |                          | <i>Abies + Rhododendron</i> | 1 |
|        |                            |                          | <i>Abies + Sorbus</i>       | 1 |
|        |                            |                          | <i>Acer + Cephalotaxus</i>  | 1 |
|        |                            |                          | <i>Juniperus + Salix</i>    | 1 |
|        |                            |                          | <i>Picea + Betula</i>       | 1 |
|        |                            |                          | <i>Picea + Quercus</i>      | 1 |
|        |                            |                          | <i>Pinus + Alnus</i>        | 3 |
|        |                            |                          | <i>Pinus + Castanopsis</i>  | 1 |
|        |                            |                          | <i>Pinus + Lithocarpus</i>  | 2 |
|        |                            |                          | <i>Pinus + Populus</i>      | 1 |
|        | <i>Pinus + Quercus</i>     |                          | 2                           |   |
|        | <i>Taxus + Acer</i>        | 1                        |                             |   |
|        | <i>Tsuga + Lithocarpus</i> | 1                        |                             |   |
|        | DBF                        | <i>Alnus</i>             | 6                           |   |
|        |                            | <i>Alnus + Quercus</i>   | 1                           |   |
|        |                            | <i>Betula</i>            | 5                           |   |

---

|      |                                          |   |
|------|------------------------------------------|---|
|      | <i>Dalbergia</i>                         | 1 |
|      | <i>Populus</i>                           | 3 |
|      | <i>Populus + Litsea + Viburnum</i>       | 1 |
|      | <i>Prunus</i>                            | 2 |
|      | <i>Pyrus</i>                             | 1 |
|      | <i>Quercus</i>                           | 3 |
|      | <i>Salix</i>                             | 2 |
|      | <i>Tilia + Cornus + Corylus</i>          | 1 |
|      | <i>Toxicodendron + Quercus</i>           | 1 |
| EDBF | <i>Alnus + Castanopsis</i>               | 1 |
|      | <i>Alnus + Saurauia</i>                  | 1 |
|      | <i>Alnus + Ternstroemia</i>              | 1 |
|      | <i>Betula + Quercus</i>                  | 1 |
|      | <i>Castanopsis + Litsea</i>              | 1 |
|      | <i>Castanopsis + Quercus</i>             | 1 |
|      | <i>Pistacia + Dalbergia</i>              | 1 |
|      | <i>Quercus + Albizia</i>                 | 1 |
|      | <i>Quercus + Corylopsis</i>              | 1 |
|      | <i>Quercus + Pistacia</i>                | 1 |
|      | <i>Salix + Quercus</i>                   | 1 |
| EBF  | <i>Acacia</i>                            | 1 |
|      | <i>Castanopsis</i>                       | 1 |
|      | <i>Exbucklandia + Schima</i>             | 1 |
|      | <i>Lithocarpus</i>                       | 1 |
|      | <i>Lithocarpus + Quercus + Symplocos</i> | 1 |
|      | <i>Mallotus + Ficus</i>                  | 1 |
|      | <i>Mallotus + Machilus</i>               | 1 |
|      | <i>Morella</i>                           | 1 |
|      | <i>Pistacia</i>                          | 2 |

---

|           |     |                                                  |    |
|-----------|-----|--------------------------------------------------|----|
|           |     | <i>Quercus</i>                                   | 12 |
|           |     | <i>Quercus + Ilex</i>                            | 1  |
|           |     | <i>Sarcosperma</i>                               | 1  |
|           |     | <i>Saurauia</i>                                  | 1  |
|           |     | <i>Schima</i>                                    | 1  |
|           | RF  | <i>Aidia + Oreocnide</i>                         | 1  |
|           |     | <i>Altingia</i>                                  | 1  |
|           |     | <i>Castanopsis + Altingia</i>                    | 1  |
| Shrubland | ENS | <i>Juniperus</i>                                 | 10 |
|           | NBS | <i>Juniperus + Ribes + Spiraea</i>               | 1  |
|           |     | <i>Salix + Juniperus</i>                         | 1  |
|           |     | <i>Sibiraea + Juniperus + Caragana</i>           | 1  |
|           | DBS | <i>Abelia + Berberis + Rosa + Cotinus</i>        | 1  |
|           |     | <i>Ajania</i>                                    | 1  |
|           |     | <i>Artemisia</i>                                 | 1  |
|           |     | <i>Berberis</i>                                  | 6  |
|           |     | <i>Berberis + Cotoneaster</i>                    | 1  |
|           |     | <i>Berberis + Lonicera</i>                       | 1  |
|           |     | <i>Caryopteris</i>                               | 2  |
|           |     | <i>Corylus</i>                                   | 1  |
|           |     | <i>Cotoneaster - Artemisia</i>                   | 1  |
|           |     | <i>Elsholtzia + Rubus + Hypericum + Viburnum</i> | 1  |
|           |     | <i>Excoecaria</i>                                | 1  |
|           |     | <i>Lonicera + Cotoneaster</i>                    | 1  |
|           |     | <i>Prunus + Zanthoxylum + Isodon</i>             | 1  |
|           |     | <i>Rhamnus</i>                                   | 2  |
|           |     | <i>Rosa</i>                                      | 2  |
|           |     | <i>Rosa + Berberis + Isodon</i>                  | 1  |
|           |     | <i>Rosa + Cotoneaster + Berberis</i>             | 1  |

|      |                                               |   |
|------|-----------------------------------------------|---|
|      | <i>Salix</i>                                  | 7 |
|      | <i>Salix + Dasiphora</i>                      | 1 |
|      | <i>Sibiraea</i>                               | 2 |
|      | <i>Sibiraea + Salix</i>                       | 1 |
|      | <i>Sophora</i>                                | 1 |
|      | <i>Sophora + Bauhinia</i>                     | 1 |
|      | <i>Sophora + Leptodermis</i>                  | 1 |
|      | <i>Spiraea</i>                                | 1 |
|      | <i>Vitex</i>                                  | 1 |
| EDBS | <i>Ajania + Daphne</i>                        | 1 |
|      | <i>Campylotropis + Daphne</i>                 | 1 |
|      | <i>Dasiphora + Rhododendron</i>               | 1 |
|      | <i>Flueggea + Clematis</i>                    | 1 |
|      | <i>Isodon + Rosa</i>                          | 1 |
|      | <i>Itea + Viburnum + Bauhinia</i>             | 1 |
|      | <i>Prinsepia + Rosa</i>                       | 1 |
|      | <i>Quercus + Olea + Pistacia + Excoecaria</i> | 1 |
|      | <i>Rhododendron + Cotoneaster</i>             | 1 |
|      | <i>Rhododendron + Salix</i>                   | 1 |
|      | <i>Rhododendron + Sorbus</i>                  | 1 |
|      | <i>Rosa + Caryopteris - Artemisia</i>         | 1 |
|      | <i>Zanthoxylum + Chrysojasminum</i>           | 1 |
|      | <i>Zanthoxylum + Rhamnus</i>                  | 1 |
| EBS  | <i>Daphne + Quercus</i>                       | 1 |
|      | <i>Dodonaea</i>                               | 1 |
|      | <i>Gaultheria</i>                             | 1 |
|      | <i>Lithocarpus + Castanopsis</i>              | 1 |
|      | <i>Osteomeles + Fargesia</i>                  | 1 |
|      | <i>Pistacia</i>                               | 1 |

|           |    |                                   |    |
|-----------|----|-----------------------------------|----|
|           |    | <i>Quercus</i>                    | 12 |
|           |    | <i>Rhododendron</i>               | 22 |
|           | BS | <i>Fargesia</i>                   | 2  |
| Grassland | TG | <i>Carex</i>                      | 1  |
|           |    | <i>Carex + Kobresia</i>           | 2  |
|           |    | <i>Festuca</i>                    | 1  |
|           |    | <i>Festuca + Carex</i>            | 1  |
|           |    | <i>Festuca+ Kobresia</i>          | 1  |
|           |    | <i>Kobresia</i>                   | 25 |
|           |    | <i>Kobresia+ Argentina</i>        | 1  |
|           |    | <i>Kobresia + Potentilla</i>      | 1  |
|           |    | <i>Poa</i>                        | 1  |
|           |    | <i>Poa + Bistorta</i>             | 1  |
|           | RG | <i>Carex</i>                      | 5  |
|           |    | <i>Carex + Kobresia</i>           | 2  |
|           |    | <i>Carex + Kobresia + Blysmus</i> | 1  |
|           |    | <i>Carex + Potentilla</i>         | 1  |
|           |    | <i>Carex + Stipa</i>              | 1  |
|           |    | <i>Trichophorum</i>               | 1  |
|           | FG | <i>Anaphalis</i>                  | 1  |
|           |    | <i>Anaphalis + Argentina</i>      | 1  |
|           |    | <i>Androsace</i>                  | 1  |
|           |    | <i>Argentina</i>                  | 5  |
|           |    | <i>Artemisia</i>                  | 1  |
|           |    | <i>Bistorta</i>                   | 1  |
|           |    | <i>Bistorta + Trollius</i>        | 1  |
|           |    | <i>Eremogone</i>                  | 1  |
|           |    | <i>Salix - Anemone</i>            | 1  |
|           |    | <i>Sibbaldia</i>                  | 1  |

---

DNF, deciduous needleleaf forest; DENF, mixed deciduous and evergreen needleleaf forest; ENF, evergreen needleleaf forest; NBF, mixed needleleaf and broadleaf forest; DBF, deciduous broadleaf forest; EDBF, mixed evergreen and deciduous broadleaf forest; EBF, evergreen broadleaf forest; RF, rainforest; ENS, evergreen needleleaf shrubland; NBS, needleleaf and broadleaf shrubland; DBS, deciduous broadleaf shrubland; EDBS, evergreen and deciduous broadleaf shrubland; EBS, evergreen broadleaf shrubland; BS, bamboo shrubland; TG, tussock grassland; RG, rhizome grassland; FG, forb grassland; and SSG, semi-shrubby grassland.
